# Supplementary material for: THEM6‐mediated reprogramming of lipid metabolism supports treatment resistance in prostate cancer
Source: PubMed Central journal article supplement (PMC8899912; doi:10.15252/emmm.202114764), 2022-01-11
Supplement: EMMM-14-e14764-s003.pdf [file EMMM-14-e14764-s003.pdf]

# Appendix

## Appendix Table S1

| Appendix Table S1: Exact p-values for Figures 1G, 1H, 1I, 2B, 2C, 2E, 4E, 4K, EV4H |                                                                                                                                                                                                                                                                                                                                                                                                                                                                                                                                                                            |
|------------------------------------------------------------------------------------|----------------------------------------------------------------------------------------------------------------------------------------------------------------------------------------------------------------------------------------------------------------------------------------------------------------------------------------------------------------------------------------------------------------------------------------------------------------------------------------------------------------------------------------------------------------------------|
| Fig. 1G                                                                            | <p>Orthografts - 22rv1 THEM6 KO</p> <p>two-tailed Mann-Whitney U test</p> <p>KO/CTL<br/>           Week 3p = 0.0079<br/>           Week 4p = 0.0079<br/>           Week 5p = 0.0079<br/>           Week 6p = 0.0079<br/>           Week 7p = 0.0317</p>                                                                                                                                                                                                                                                                                                                    |
| Fig. 1H                                                                            | <p>Xenografts - LNCaP Al THEM6 KO</p> <p>two-tailed Mann-Whitney U test</p> <p>KO/CTL<br/>           Week 3n.s.<br/>           Week 4n.s.<br/>           Week 5n.s.<br/>           Week 6p = 0.0175<br/>           Week 7p = 0.0041</p>                                                                                                                                                                                                                                                                                                                                    |
| Fig. 1I                                                                            | <p>Orthografts - CWR22res THEM6 KO</p> <p>Kruskal-Wallis test</p> <p>KO1/CTLKO2/CTL<br/>           Week 3n.s.n.s.<br/>           Week 5n.s.n.s.<br/>           Week 6n.s.p = 0.0324<br/>           Week 7p = 0.0357p = 0.0265</p>                                                                                                                                                                                                                                                                                                                                          |
| Fig. 2B                                                                            | <p>Total lipids - 22rv1 THEM6 KO</p> <p>1-way ANOVA - Dunnett's multiple comparison test</p> <p>KO1/CTLKO2/CTL<br/>           DAGp = 0.0451n.s.<br/>           TGp &lt; 0.0001p &lt; 0.0001<br/>           PCn.s.n.s.<br/>           PEp = 0.0001p = 0.0048<br/>           Pln.s.n.s.<br/>           LysoPCn.s.n.s.<br/>           LysoPEp = 0.0084<br/>           Ether TGp &lt; 0.0001p = 0.0002<br/>           Ether PCn.s.n.s.<br/>           Ether PEp = 0.0001<br/>           Cer.p = 0.0007p = 0.0027<br/>           SMn.s.n.s.<br/>           CEn.s.p = 0.0003</p> |
| Fig. 2C                                                                            | <p>Total lipids - LNCaP Al THEM6 KO</p> <p>1-way ANOVA - Dunnett's multiple comparison test</p> <p>KO1/CTLKO2/CTL<br/>           DAGp = 0.0005p = 0.0464<br/>           TGp = 0.0010n.s.<br/>           PCn.s.n.s.<br/>           PEN.s.n.s.<br/>           Pln.s.n.s.<br/>           LysoPCn.s.n.s.<br/>           LysoPEp = 0.0004p = 0.0118<br/>           Ether TGp = 0.0020p = 0.0225<br/>           Ether PCp = 0.0005p = 0.0034<br/>           Ether PEN.s.n.s.<br/>           Cer.p = 0.0003n.s.<br/>           SMn.s.n.s.<br/>           CEn.s.n.s.</p>           |
| Fig. 2E                                                                            | <p>Total lipids - CWR22res THEM6 OE</p> <p>two-tailed Student t-test</p> <p>OE/EV<br/>           DAGp = 0.0002<br/>           TGp = 0.0009<br/>           PCn.s.<br/>           PEp = 0.0043<br/>           Plp &lt; 0.0001<br/>           LysoPCn.s.<br/>           LysoPEp = 0.0341<br/>           Ether TGp = 0.0341<br/>           Ether PCp = 0.0013<br/>           Ether PEp = 0.0030<br/>           Cer.p = 0.0188<br/>           SMp = 0.0001<br/>           CEn.s.</p>                                                                                            |

Fig. 4E

Desmosterol

1-way ANOVA - Dunnett's multiple comparison test

KO1/CTLKO2/CTL  
 m/z 0p = 0.0002p < 0.0001  
 m/z +1n.s.n.s.  
 m/z +2n.s.n.s.  
 m/z +3n.s.n.s.  
 m/z +4n.s.n.s.  
 m/z +5p = 0.0004p = 0.0002  
 m/z +6p = 0.0096p = 0.0017  
 m/z +7p = 0.0007p = 0.0001  
 m/z +8p = 0.0029p = 0.0013  
 m/z +9p < 0.0001p < 0.0001  
 m/z +10p = 0.0099p = 0.0026  
 m/z +11p = 0.0022p = 0.0033  
 m/z +12n.s.p = 0.0325  
 m/z +13n.s.n.s.  
 m/z +14n.s.p = 0.0160  
 m/z +15p = 0.0027p = 0.0010  
 m/z +16p = 0.0002p < 0.0001  
 m/z +17p < 0.0001p < 0.0001  
 m/z +18p < 0.0001p < 0.0001  
 m/z +19p < 0.0001p < 0.0001  
 m/z +20p < 0.0001p < 0.0001  
 m/z +21p < 0.0001p < 0.0001  
 m/z +22p < 0.0001p < 0.0001  
 m/z +23p < 0.0001p < 0.0001  
 m/z +24p < 0.0001p < 0.0001  
 m/z +25p < 0.0001p < 0.0001  
 m/z +26n.s.p = 0.0249  
 m/z +27n.s.n.s.

Fig. 4K

Palmitic acid

1-way ANOVA - Dunnett's multiple comparison test

KO1/CTLKO2/CTL  
 m/z 0p = 0.0012p = 0.0020  
 m/z +1p = 0.0028p = 0.0188  
 m/z +2p < 0.0001p < 0.0001  
 m/z +3p < 0.0001p < 0.0001  
 m/z +4p < 0.0001p < 0.0001  
 m/z +5p = 0.0007p = 0.0002  
 m/z +6p < 0.0001p < 0.0001  
 m/z +7p = 0.0006p = 0.0002  
 m/z +8p < 0.0001p < 0.0001  
 m/z +9n.s.n.s.  
 m/z +10p < 0.0001p < 0.0001  
 m/z +11p < 0.0001p < 0.0001  
 m/z +12p < 0.0001p < 0.0001  
 m/z +13p < 0.0001p < 0.0001  
 m/z +14p < 0.0001p < 0.0001  
 m/z +15p = 0.0003p = 0.0003  
 m/z +16p < 0.0001p < 0.0001

Fig. EV4H

Palmitic acid

two-tailed Student t-test

KO1/CTL  
 m/z 0p = 0.0070  
 m/z +1p = 0.0328  
 m/z +2n.s.  
 m/z +3n.s.  
 m/z +4p = 0.0171  
 m/z +5n.s.  
 m/z +6p = 0.0055  
 m/z +7n.s.  
 m/z +8p = 0.0008  
 m/z +9n.s.  
 m/z +10p = 0.0016  
 m/z +11n.s.  
 m/z +12p = 0.0032  
 m/z +13n.s.  
 m/z +14p = 0.0025  
 m/z +15n.s.  
 m/z +16p = 0.0052
